# Supplementary material for: Psychological Distress Associated with Enforced Hospital Isolation Due to COVID-19 during the “Flatten the Curve” Phase in Morocco: A Single-Center Cross-Sectional Study
Source: MDPI journal article supplement (doi:10.3390/healthcare12050548), 2024-02-26
Supplement: s1 [file s1]

## Supplementary File

**Figure S1: Hospital Anxiety and Depression Scale (HADS)**

**Hospital Anxiety and Depression Scale (HADS)**

Tick the box beside the reply that is closest to how you have been feeling in the past week.  
Don't take too long over you replies: your immediate is best.

| D | A |                                                                                     | D | A |                                                                              |
|---|---|-------------------------------------------------------------------------------------|---|---|------------------------------------------------------------------------------|
|   |   | <b>I feel tense or 'wound up':</b>                                                  |   |   | <b>I feel as if I am slowed down:</b>                                        |
|   | 3 | Most of the time                                                                    | 3 |   | Nearly all the time                                                          |
|   | 2 | A lot of the time                                                                   | 2 |   | Very often                                                                   |
|   | 1 | From time to time, occasionally                                                     | 1 |   | Sometimes                                                                    |
|   | 0 | Not at all                                                                          | 0 |   | Not at all                                                                   |
|   |   | <b>I still enjoy the things I used to enjoy:</b>                                    |   |   | <b>I get a sort of frightened feeling like 'butterflies' in the stomach:</b> |
| 0 |   | Definitely as much                                                                  |   | 0 | Not at all                                                                   |
| 1 |   | Not quite so much                                                                   |   | 1 | Occasionally                                                                 |
| 2 |   | Only a little                                                                       |   | 2 | Quite Often                                                                  |
| 3 |   | Hardly at all                                                                       |   | 3 | Very Often                                                                   |
|   |   | <b>I get a sort of frightened feeling as if something awful is about to happen:</b> |   |   | <b>I have lost interest in my appearance:</b>                                |
|   | 3 | Very definitely and quite badly                                                     | 3 |   | Definitely                                                                   |
|   | 2 | Yes, but not too badly                                                              | 2 |   | I don't take as much care as I should                                        |
|   | 1 | A little, but it doesn't worry me                                                   | 1 |   | I may not take quite as much care                                            |
|   | 0 | Not at all                                                                          | 0 |   | I take just as much care as ever                                             |
|   |   | <b>I can laugh and see the funny side of things:</b>                                |   |   | <b>I feel restless as I have to be on the move:</b>                          |
| 0 |   | As much as I always could                                                           |   | 3 | Very much indeed                                                             |
| 1 |   | Not quite so much now                                                               |   | 2 | Quite a lot                                                                  |
| 2 |   | Definitely not so much now                                                          |   | 1 | Not very much                                                                |
| 3 |   | Not at all                                                                          |   | 0 | Not at all                                                                   |
|   |   | <b>Worrying thoughts go through my mind:</b>                                        |   |   | <b>I look forward with enjoyment to things:</b>                              |
|   | 3 | A great deal of the time                                                            | 0 |   | As much as I ever did                                                        |
|   | 2 | A lot of the time                                                                   | 1 |   | Rather less than I used to                                                   |
|   | 1 | From time to time, but not too often                                                | 2 |   | Definitely less than I used to                                               |
|   | 0 | Only occasionally                                                                   | 3 |   | Hardly at all                                                                |
|   |   | <b>I feel cheerful:</b>                                                             |   |   | <b>I get sudden feelings of panic:</b>                                       |
| 3 |   | Not at all                                                                          |   | 3 | Very often indeed                                                            |
| 2 |   | Not often                                                                           |   | 2 | Quite often                                                                  |
| 1 |   | Sometimes                                                                           |   | 1 | Not very often                                                               |
| 0 |   | Most of the time                                                                    |   | 0 | Not at all                                                                   |
|   |   | <b>I can sit at ease and feel relaxed:</b>                                          |   |   | <b>I can enjoy a good book or radio or TV program:</b>                       |
|   | 0 | Definitely                                                                          | 0 |   | Often                                                                        |
|   | 1 | Usually                                                                             | 1 |   | Sometimes                                                                    |
|   | 2 | Not Often                                                                           | 2 |   | Not often                                                                    |
|   | 3 | Not at all                                                                          | 3 |   | Very seldom                                                                  |

Please check you have answered all the questions

**Scoring:**

Total score: Depression (D) \_\_\_\_\_ Anxiety (A) \_\_\_\_\_

0-7 = Normal

8-10 = Borderline abnormal (borderline case)

11-21 = Abnormal (case)
